# Supplementary material for: Biochemical Characterization of purified β-amylase from Dioscorea alata (water yam)
Source: Research Square preprint supplement (doi:10.21203/rs.3.rs-121865/v1), 2020-12-07
Supplement: Supplementary file 1 [file f9d62d1c67de0af01bd34159.docx]

**Thermodynamics parameters**


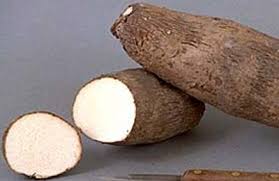


**Partial**

**purification**

**Immobilization**

***Dioscorea alata* (water yam)**


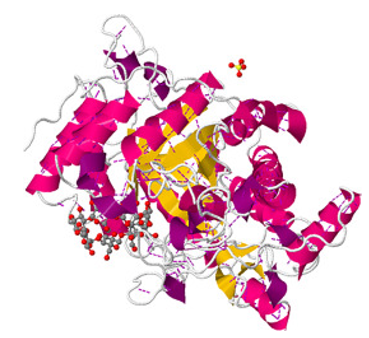


**Catalysis**

**Characterization**

**Inactivation**

**Amino acid composition**

**C**

**Floresencing**

**β-amylase**
